# Supplementary material for: MFSD1 with its accessory subunit GLMP functions as a general dipeptide uniporter in lysosomes
Source: PubMed Central journal article supplement (PMC11252000; doi:10.1038/s41556-024-01436-5), 2024-06-05

# Source Data Figure 1

Figure 1b

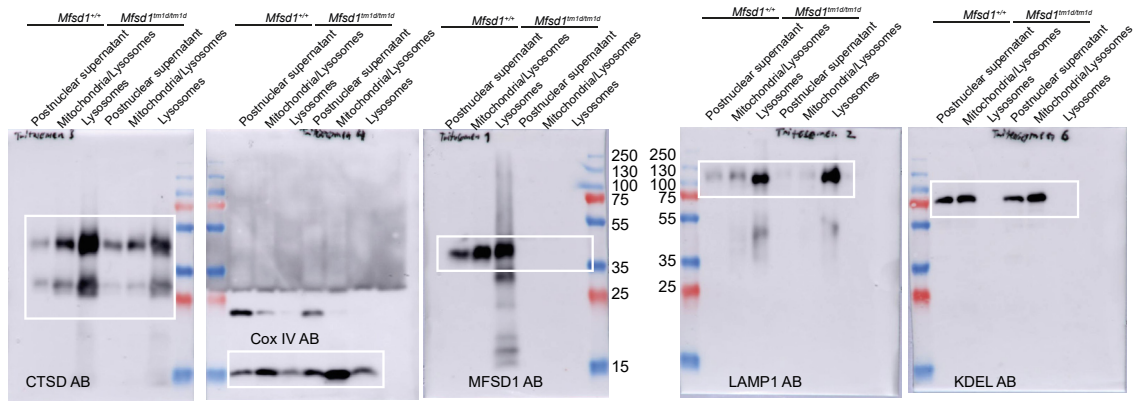

Figure 1F

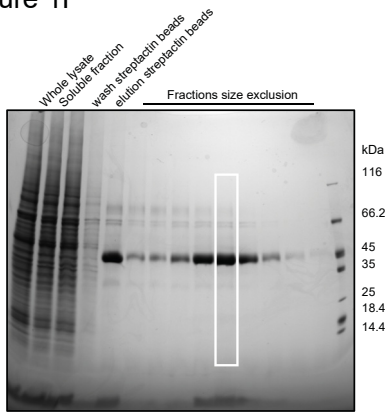

# Source Data Figure 3

## Figure 3a

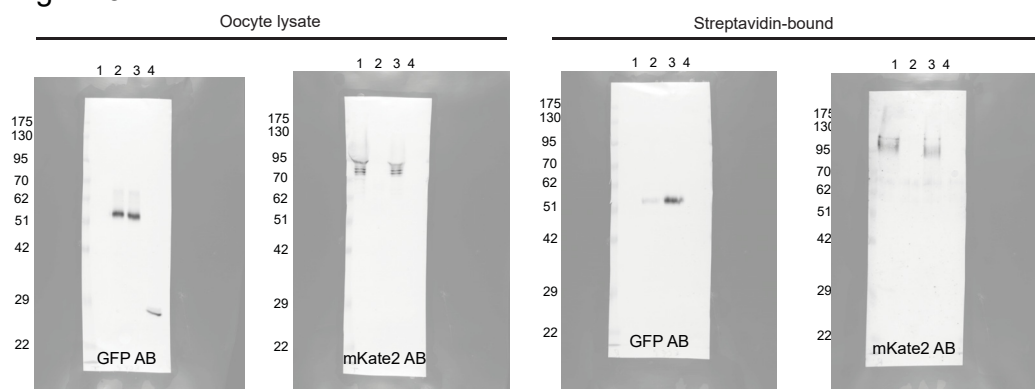

Lanes:  
1 = GLMP-Y400A-mKate2  
2 = MFSD1-L11A/L12A-EGFP  
3 = 1+2 co-expression  
4 = EGFP

# Source Data Figure 4

Figure 4b

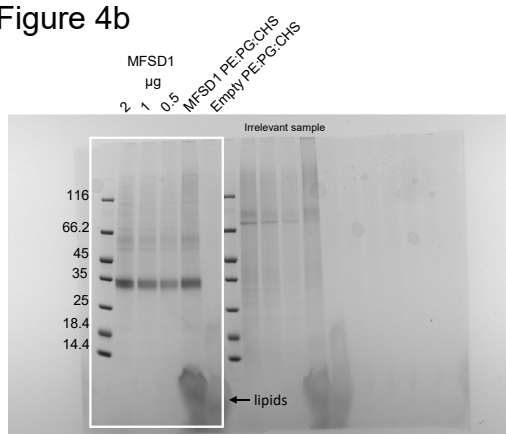

# Source Data Extended Figure 5

Extended Figure 5a

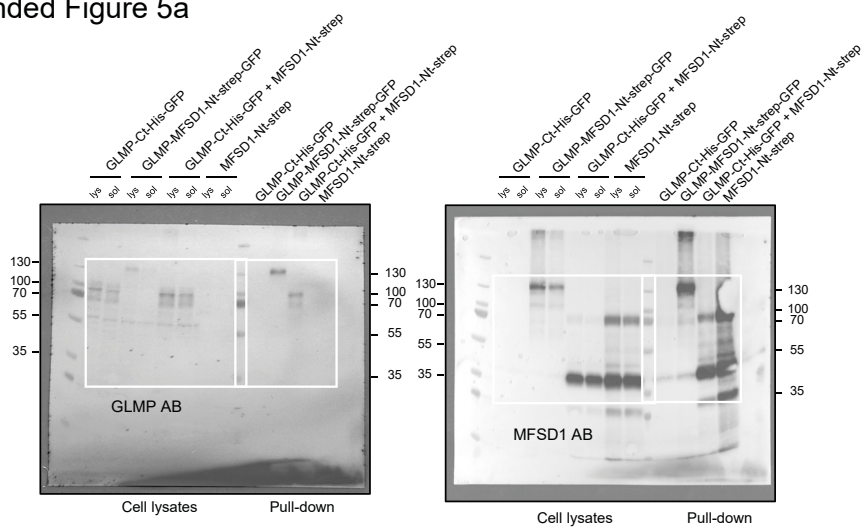

Extended Figure 5b & 5e

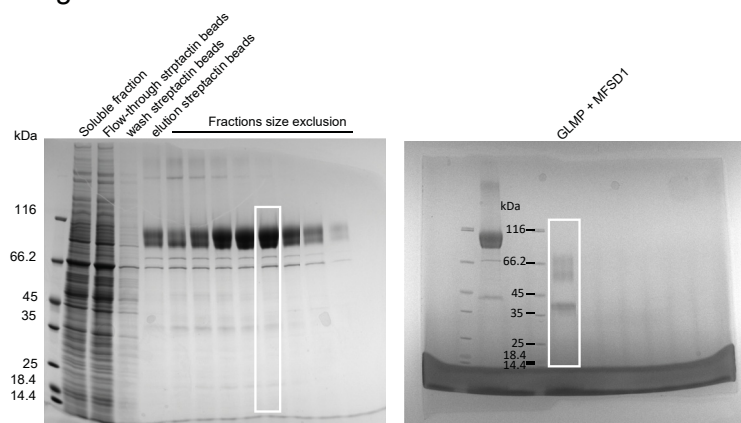

# Source Data Extended Figure 10

Extended Figure 10b

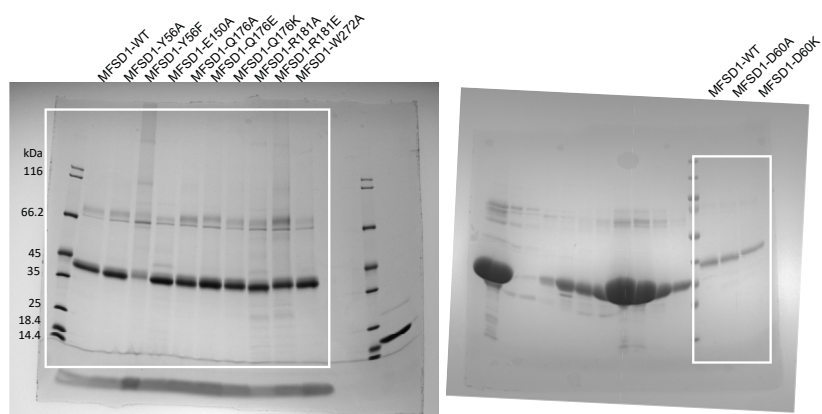

Supplement: 41556_2024_1436_MOESM7_ESM.pdf [file 41556_2024_1436_MOESM7_ESM.pdf]
